# Supplementary material for: Collective Genetic Interaction Effects and the Role of Antigen-Presenting Cells in Autoimmune Diseases
Source: PubMed Central journal article supplement (PMC5231276; doi:10.1371/journal.pone.0169918), 2017-01-12

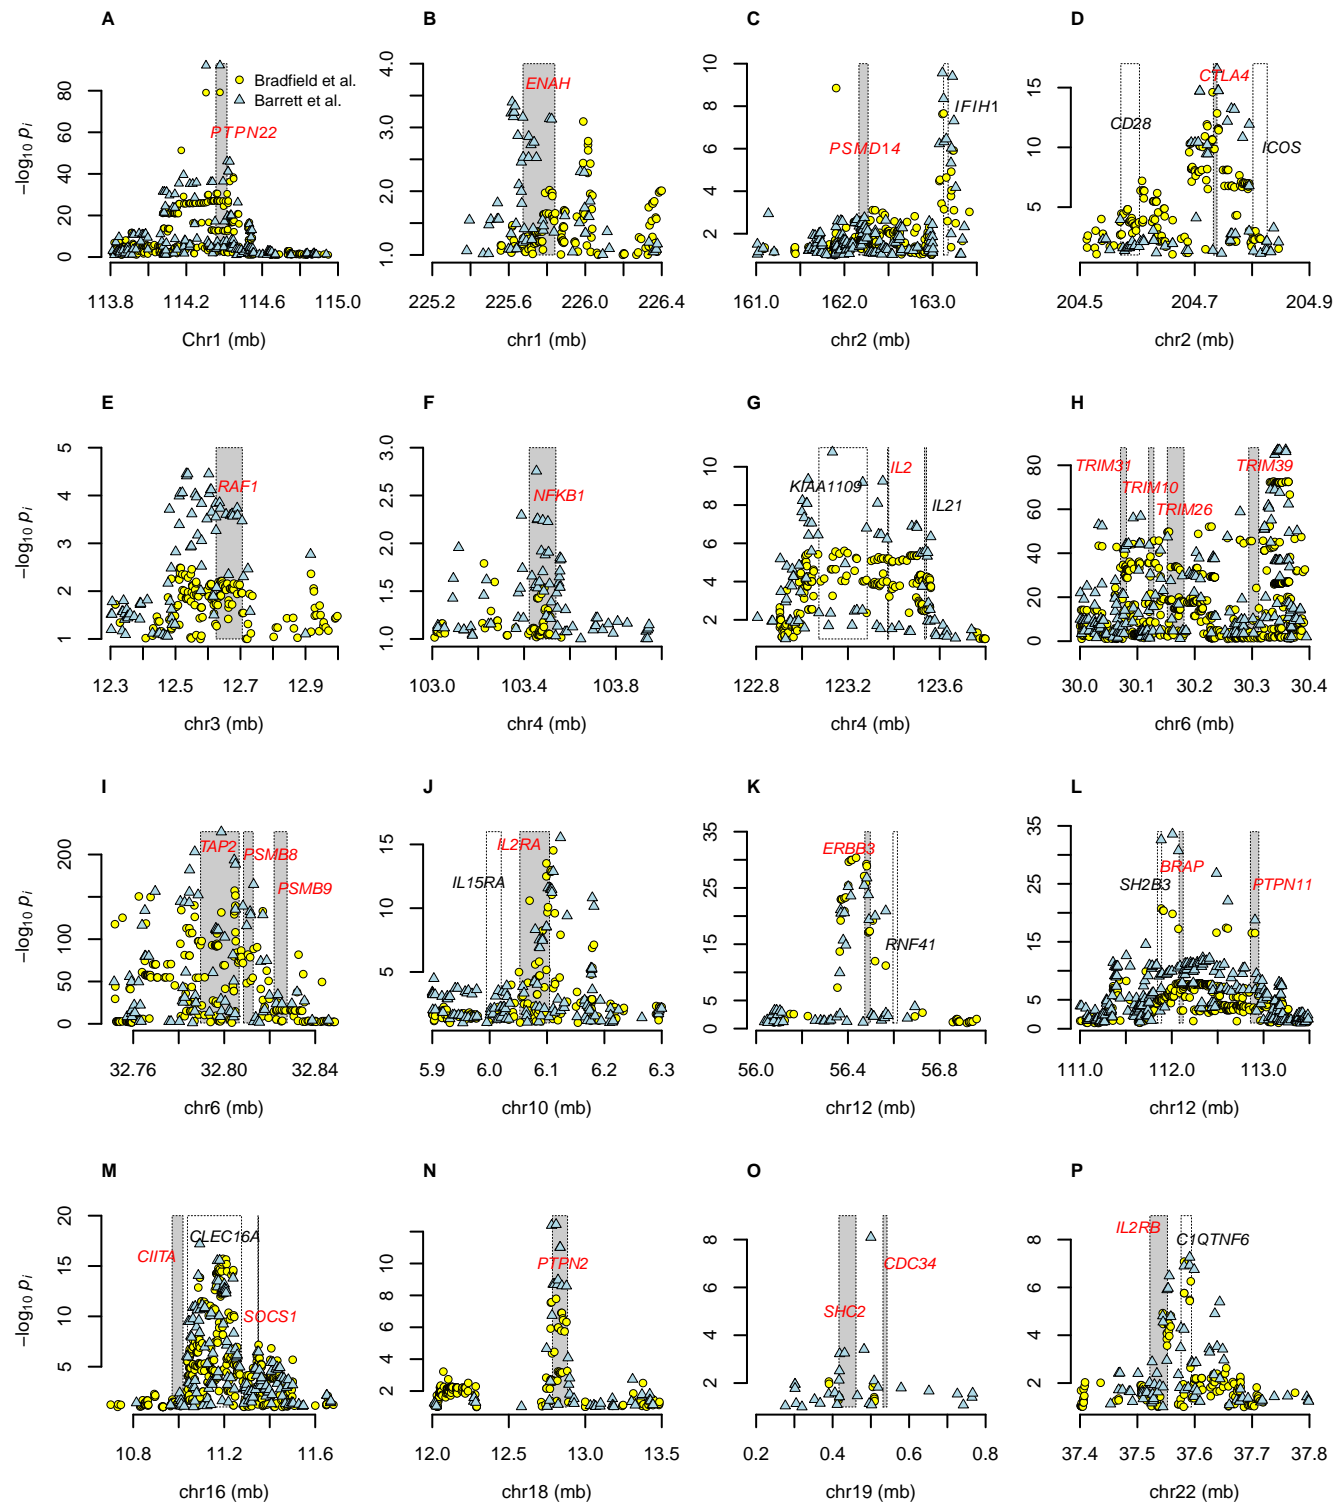

Supplement: pone.0169918.s009.pdf [file pone.0169918.s009.pdf]
